# Supplementary material for: Concurrent functional ultrasound imaging with graphene-based DC-coupled electrophysiology as a platform to study slow brain signals and cerebral blood flow under control and pathophysiological brain states
Source: Royal Society of Chemistry journal article supplement (doi:10.1039/d3nh00521f), 2024-01-01
Supplement: d3nh00521f1.pdf [file d3nh00521f1.pdf]

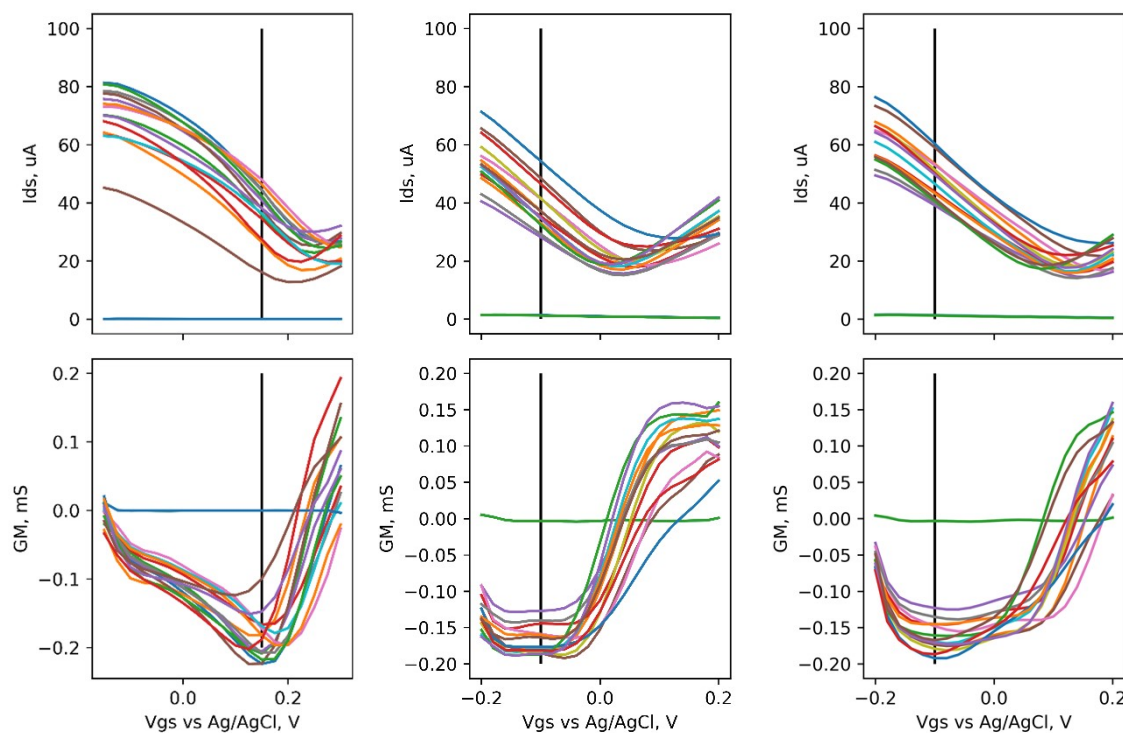

Supplementary figure 1. In vivo measured electrical characteristics of a graphene transistors array with 16 channels measured at 50 mV drain-to-source voltage for three different experiments. Top: Current ( $I_{ds}$ )-voltage characteristics for each of the gFETs in the array in each of the three experiments. Bottom: Calculated transconductance (GM:  $dI_{ds}/dV_{gs}$ ) for each of the gFETs in the array in each of the three experiments. Black vertical lines denotes the used  $V_{gs}$  bias point for that experiment.
